# Supplementary material for: A rapid methods development workflow for high-throughput quantitative proteomic applications
Source: PubMed Central journal article supplement (PMC6375547; doi:10.1371/journal.pone.0211582), 2019-02-14

# TCA cycle proteins

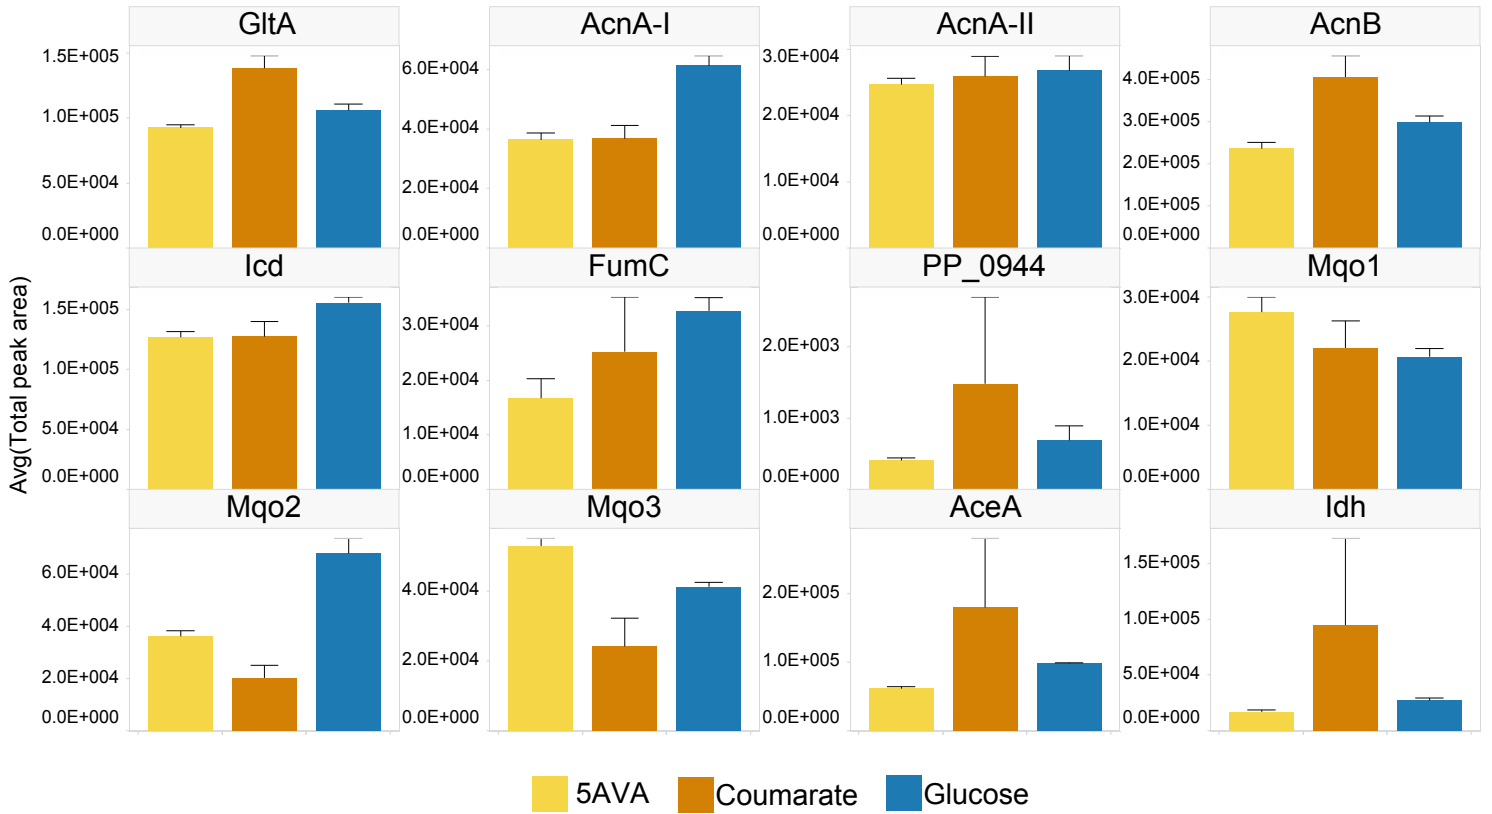

## Glycolysis pathway proteins

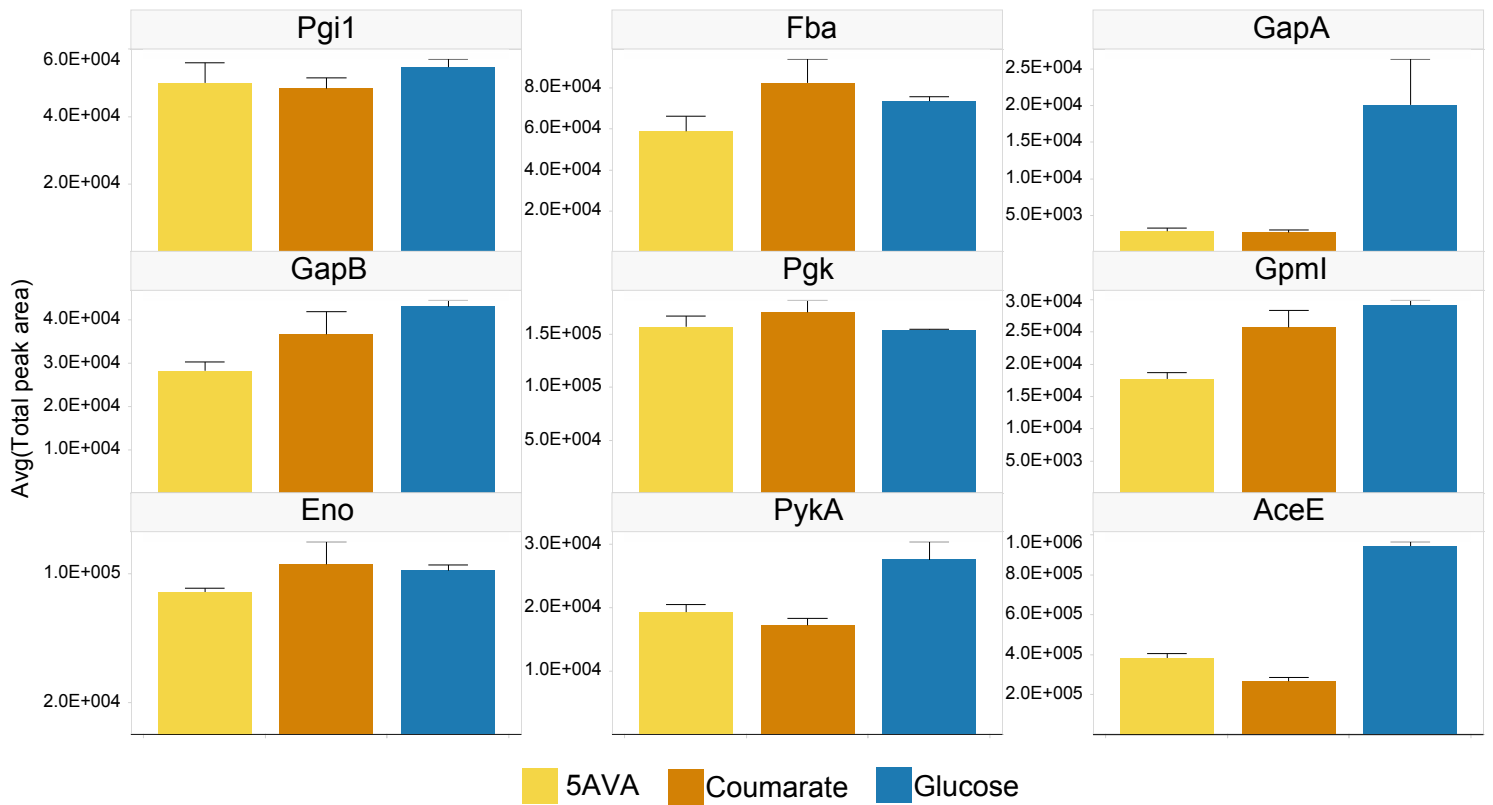

## Pentose phosphate pathway proteins

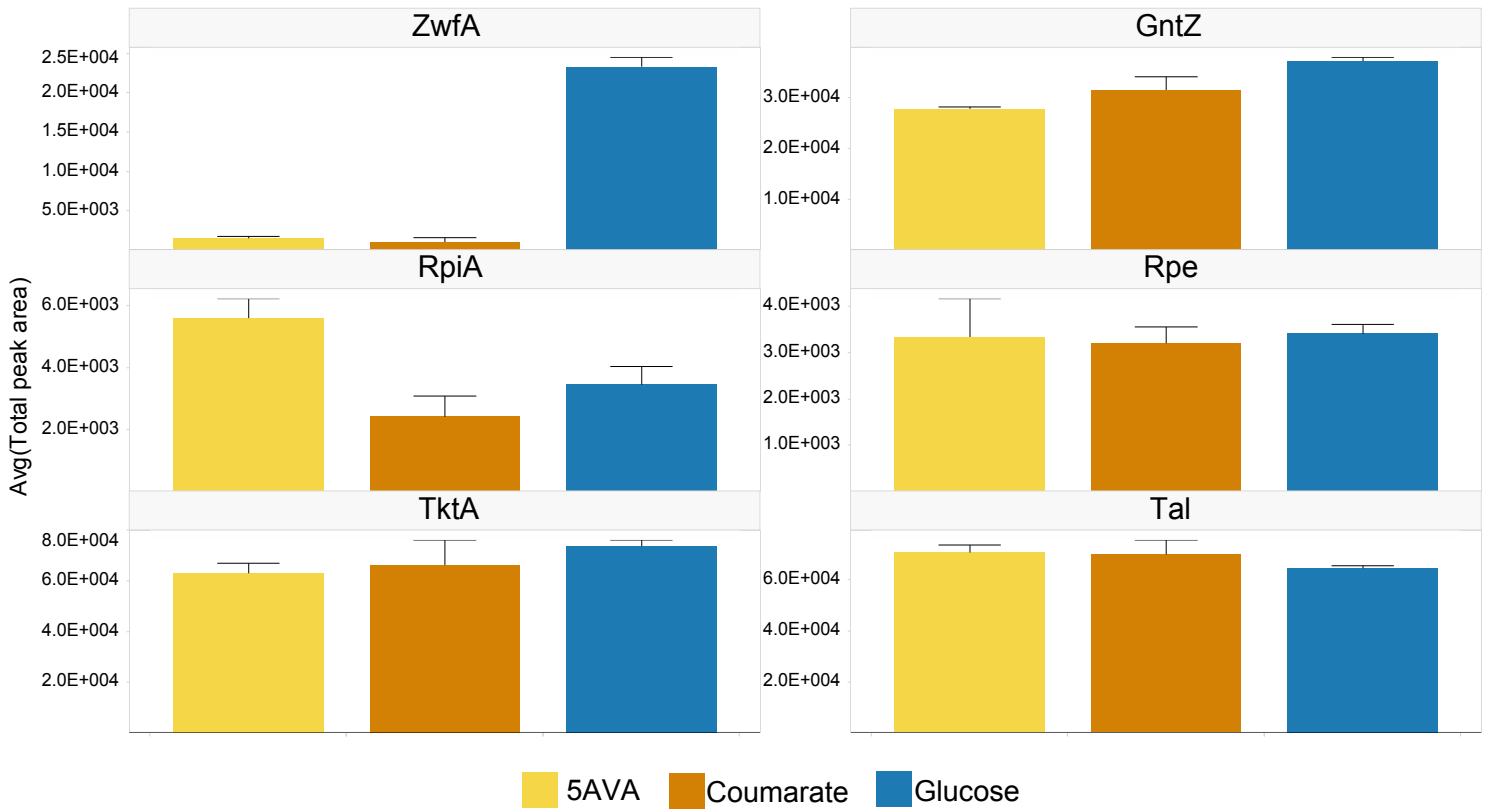

Supplement: pone.0211582.s004.pdf [file pone.0211582.s004.pdf]
